# Supplementary material for: Transepidermal water loss rises before food anaphylaxis and predicts food challenge outcomes
Source: PubMed Central journal article supplement (PMC10425212; doi:10.1172/jci168965), 2023-08-15

### Supplemental Table 1: Normality testing for baseline biochemical markers

| <b>Biomarker</b> | <b>Test</b>        | <b>p-Value</b> |
|------------------|--------------------|----------------|
| Tryptase         | Kolmogorov-Smirnov | 0.1500         |
| IL_1b            | Kolmogorov-Smirnov | 0.1500         |
| IL_3             | Kolmogorov-Smirnov | 0.0100         |
| IL_4             | Kolmogorov-Smirnov | 0.0100         |
| IL_5             | Kolmogorov-Smirnov | 0.1500         |
| IL_6             | Kolmogorov-Smirnov | 0.0100         |
| IL_9             | Kolmogorov-Smirnov | 0.0956         |
| IL_10            | Kolmogorov-Smirnov | 0.0428         |
| IL_13            | Kolmogorov-Smirnov | 0.0100         |
| TNF_alpha        | Kolmogorov-Smirnov | 0.0100         |
| VEGF             | Kolmogorov-Smirnov | 0.0140         |

**Supplemental Figure 1: Change in sTEWL results from baseline – nonreactors vs reactors.** Each panel shows the change in TEWL from baseline to either food dose 2 or 3 for nonreactors (n = 62) or prior to epinephrine or other treatment for reactors (n = 14). Estimation plots for pairwise p values for each group are shown. \*\*\*\* p < 0.0001. \*\*\* p < 0.001.

**Supplemental Figure 2: TEWL values on normal skin versus urticarial wheal and flare.** TEWL values on skin without a hive (normal skin, n = 3) and skin with a histamine-induced hive (flare n = 2, wheal n = 5). Each point represents a measurement taken in triplicate. "Normal skin" denotes skin without any visual evidence of any lesion from a volar forearm with no skin prick testing done. "Flare" measurements were taken from skin with a visible flare as soon as the flare was visible after a skin prick test histamine positive control was placed. "Wheal" measurements were taken from skin with a visible wheal as soon as the wheal was visible and measured > 3 mm after a skin prick test histamine positive control was placed. ANOVA was used to compare means for three-or-more-variable plots. \*\* p < 0.01. \* p < 0.05.

**Supplemental Figure 3: TEWL change correspondence with wheal and flare values of skin testing and blood IgE testing.** Each panel shows the TEWL change plotted on the y-axis versus the relevant food test result, whether skin test wheal, skin test flare, or food-specific blood IgE result (total n = 84).

**Supplemental Figure 4: Additional details on tryptase and IL-3 changes.** Tryptase (n = 20) and IL-3 (n = 14) changes from baseline by reaction status are shown in the left panels. Tryptase and IL-3 changes are shown plotted against the challenge static TEWL change in the right panels. Pairwise t-tests were used to compare baseline to post-OFC for tryptase and IL-3 values. A Pearson correlation coefficient for TEWL change and biomarker change was calculated for each plot, denoted by Pearson r here. The Pearson r significance is denoted by the p value listed on the R panels. \* p < 0.05. ns = not significant.

**Supplemental Figure 5: Time to event for reactions delineated by epinephrine requirement.** Time to first symptom and time to 1-unit TEWL rise for reactions requiring epinephrine (n = 9) and for reactions that did not (n = 5). Note that CoFAR grade 2 reactions were treated with epinephrine and CoFAR grade 1 reactions were not. Simple t-tests were used to compare two-variable plots. ns = not significant.

Nonreactors - all

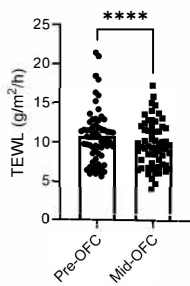

Estimation Plot

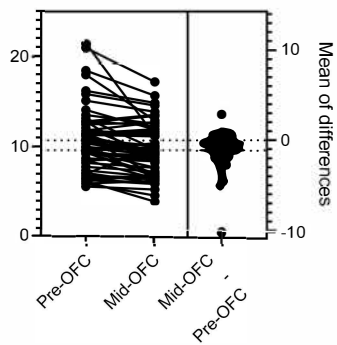

Reactors - all

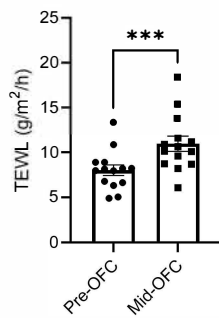

Estimation Plot

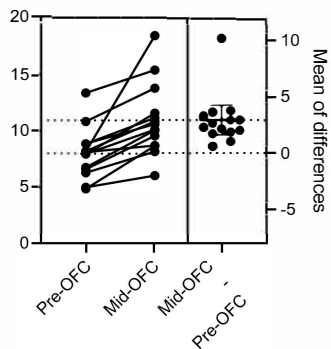

# Histamine-induced hive

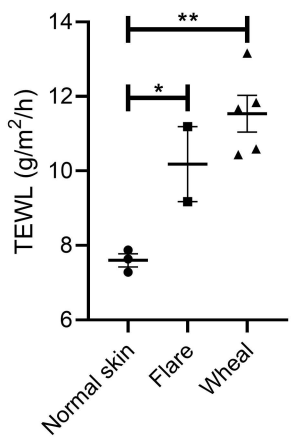



TEWL change versus wheal overall

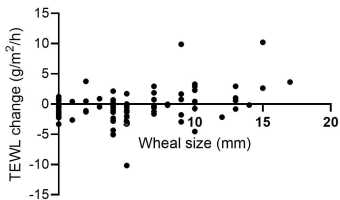

TEWL change versus wheal reactors vs nonreactors

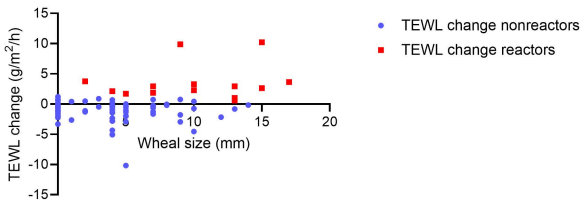

TEWL change versus flare overall

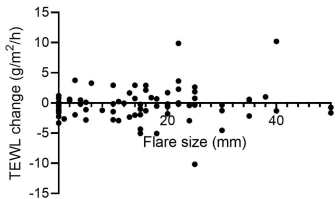

TEWL change versus flare reactors vs nonreactors

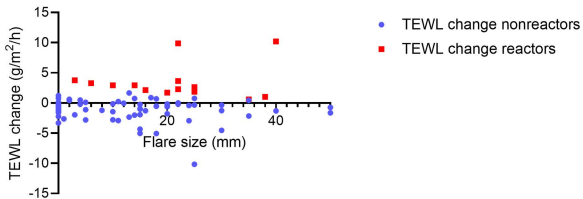

TEWL change versus sIgE overall

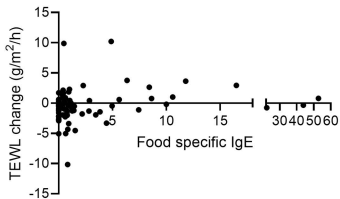

TEWL change versus sIgE reactors vs nonreactors

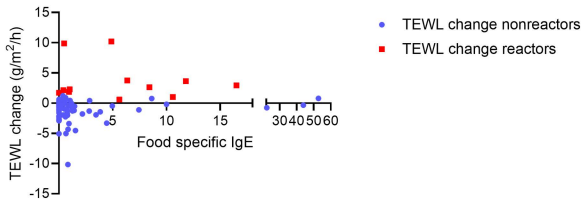

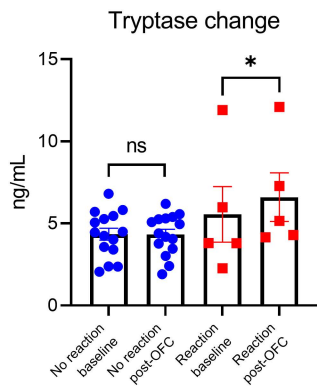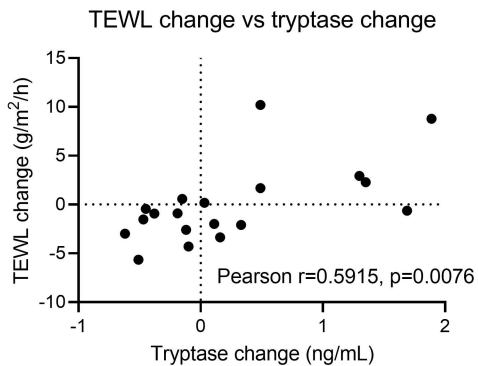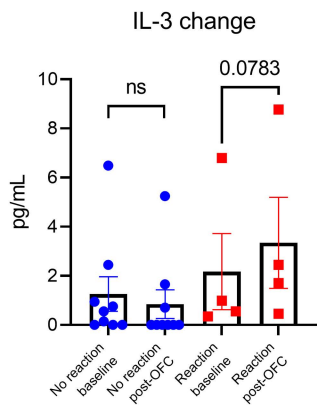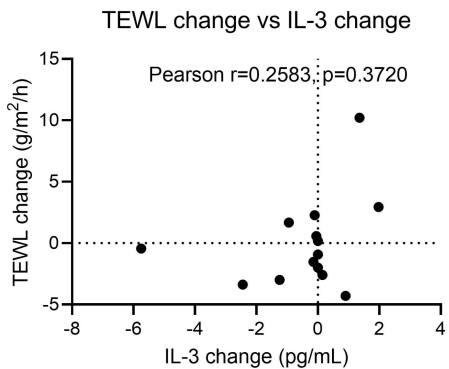

Time to first symptom

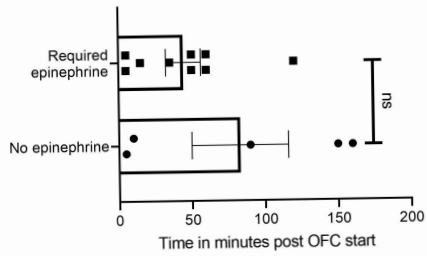

Time to 1 g/m<sup>2</sup>/h TEWL rise

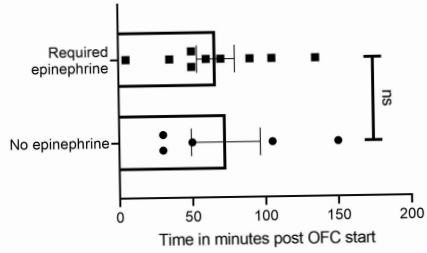

Supplement: jci-133-168965-s027.pdf [file jci-133-168965-s027.pdf]
